# Supplementary material
Source: Elsevier journal article supplement (https://www.sciencedirect.com/science/article/pii/S1695403320302356)
Supplement: mmc1 [file S1695403320302356:mmc1.docx]

**ANPEDIA-19-647**

**CARACTERÍSTICAS CLÍNICO-EPIDEMIOLÓGICAS DE LA NEUMONÍA POR *PNEUMOCYSTIS JIROVECII* EN UN HOSPITAL DE TERCER NIVEL EN ESPAÑA◊**

**Título abreviado:** Neumonía por *Pneumocystis jirovecii*

Laura Martín Pedraz*, Begoña Carazo Gallego, David Moreno Pérez

Unidad de Infectología Pediátrica- UGC Pediatría- Hospital Regional Universitario de Málaga.

**◊**Presentaciones previas en congresos: *IX Congreso de la Sociedad Española de Infectología Pediátrica- Sevilla 2018. *66 Congreso de la Asociación Española de Pediatría- Zaragoza 2018

*Correo electrónico: [pedraz88@hotmail.com](mailto:pedraz88@hotmail.com)

**Introducción:** La infección por VIH era el principal factor de riesgo para padecer neumonía por *Pneumocystis jirovecii* (NPJ). En la actualidad, las características clínico-epidemiológicas de la NPJ en niños han cambiado, existiendo pocos estudios en este sentido.

**Métodos:** Realizamos un estudio observacional retrospectivo en pacientes pediátricos diagnosticados de NPJ durante 17 años en un hospital de tercer nivel en España.

**Resultados:** Se recogieron 23 pacientes, de los que 11/23 (47,8%) padecían enfermedad hematológica, 5/23 (21,7%) inmunodeficiencia primaria y 4/23 (17,4%) infección por VIH. Recibía profilaxis con trimetoprim-sulfametoxazol (TMP-SMX) 11/23 pacientes (47,8%). Todos recibieron tratamiento con TMP-SMX y 18/23 (78,3%) glucocorticoides sistémicos. Fallecieron 6/23 pacientes (26,1%), de los que 1/6 (16.7%) padecía infección por VIH. En los pacientes no-VIH con mayor leucocitosis, mayor retención de CO2 y mayor frecuencia cardíaca al debut se evidenció mayor mortalidad, diferencias no objetivadas en pacientes VIH. No se encontraron diferencias en mortalidad en relación con el factor predisponente, empleo de pTMP-SMX ni tratamiento con glucocorticoides.

**Conclusiones:** En la actualidad, los pacientes pediátricos con neoplasias hematológicas constituyen el principal grupo de riesgo de desarrollar NPJ en este grupo etario. No hemos encontrado diferencias de mortalidad entre pacientes con o sin infección por VIH como factor predisponente. Entre los pacientes no VIH la mortalidad fue mayor en aquellos que presentaron mayor leucocitosis, mayor retención de CO2 y mayor frecuencia cardíaca al debut. No se objetivó mejor pronóstico en pacientes que recibían profilaxis con TMP-SMX previamente al desarrollo de la NPJ ni en los que recibieron glucocorticoides sistémicos como parte del tratamiento.

**Palabras clave:** *Pneumocystis jirovecii*; neumonía; niños; VIH

**CLINICAL-EPIDEMIOLOGICAL CHARACTERISTICS OF PNEUMOCYSTIS *JIROVECII* PNEUMONIA IN A TERTIARY HOSPITAL IN SPAIN Introduction:** HIV infection was the main risk of suffering *Pneumocystis jirovecii* pneumonia (PJP). The clinical-epidemiological characteristics of PJP have currently changed, with there being few studies on this.

**Methods:** A retrospective observational study was carried out on paediatric patients diagnosed with PJP over a 17 year period in a third level hospital in Spain.

**Results:** A total of 23 patients were included, of whom 7/23 (47.8%) suffered a haematological disease, 5/23 (21.7%) a primary immunodeficiency, and 4/23 (17.4%) an HIV infection. Prophylaxis with trimethoprim-sulfamethoxazole (TMP-SMX) was received by 11/23 (47.8%) patients. All were treated with TMP-SMX and 18/23 (78.3%) with systemic glucocorticoids. There were six (26.1%) deaths, of which one of them (16.7%) suffered an HIV infection. A higher mortality was seen in the non-HIV patients with greater leucocytosis, greater CO2 retention, and a higher heart rate at onset, differences not observed in HIV patients. No differences were found in mortality in relation to the predisposing factor, use of pTMP-SMX, or treatment with glucocorticoids.

**Conclusions:** Paediatric patients with haematological cancers are currently the main risk group of developing PJP in this age group. No differences were found in mortality between patients with or without HIV infection as predisposing factor. The mortality among non-HIV patients was higher in those that had greater leucocytosis, greater CO2 retention, and increased heart rate at onset. A better prognosis was not seen in patients that received prophylaxis with TMP-SMX prior to the development of the PJP, or in those that received glucocorticoids as part of the treatment.

**Keywords:** *Pneumocystis jirovecii*; pneumonia; children; HIV

**INTRODUCCIÓN**

*Pneumocystis jirovecii*, anteriormente denominado *Pneumocystis carinii* y considerado un protozoo, fue clasificado posteriormente como hongo gracias a técnicas de secuenciación genética1. Se trata de un microorganismo ubicuo, capaz de producir enfermedad exclusivamente en humanos. Su transmisión se produce por vía respiratoria, persona-persona, dependiendo su capacidad de producir enfermedad del estado inmunitario del huésped.

Diferentes estudios han constatado la elevada prevalencia de anticuerpos frente a *Pneumocystis* en población pediátrica de países desarrollados, con cifras de hasta el 80% en menores de 4 años, demostrando con ello que la primoinfección por *P. jirovecii* es frecuente en la infancia2, 3, y que generalmente cursa de manera asintomática.

Pacientes inmunocomprometidos, especialmente aquellos que presenta alteraciones cualitativas o cuantitativas de los linfocitos T CD4, no son capaces de eliminar el microorganismo, presentando mayor susceptibilidad para desarrollar neumonía por *P. jirovecii* (NPJ)4, 5. El descenso en la cifra de linfocitos T CD4 es, precisamente, el principal factor de riesgo para desarrollar dicho cuadro4, 6. En consonancia con ello, clásicamente, los pacientes con infección por VIH constituían el principal grupo de riesgo para padecer NPJ, presentando cuadros clínicos más graves y con peor pronóstico en comparación con el subgrupo de pacientes no VIH4. El desarrollo de terapias antirretrovirales más efectivas y la profilaxis antimicrobiana con trimetoprim-sulfametoxazol (TMP-SMX) han cambiado la epidemiología de la enfermedad4.

El diagnóstico de la NPJ en niños suele basarse en criterios clínicos, dado que no existen hallazgos analíticos ni radiológicos específicos de dicho cuadro, siendo necesario para la confirmación microbiológica obtener una muestra mediante lavado broncoalveolar (LBA), técnica invasiva que no siempre puede realizarse en situaciones de inestabilidad respiratoria. Como alternativa al LBA, en niños mayores colaboradores y con buen estado general, puede valorarse su obtención mediante esputo inducido. En pacientes inestables, a los que no puede realizárseles LBA, puede emplearse aspirado nasofaríngeo, lavado oral o broncoaspirado (BAS), aunque la sensibilidad diagnóstica en estas muestras es baja. Con independencia del tipo de muestra extraída, la técnica gold estándar para el diagnóstico de la NPJ es la inmunofluorescencia directa (IFD)7, 8, con especificidad alta y sensibilidad variable según el tipo de muestra respiratoria empleada. Las técnicas de reacción en cadena de la polimerasa (PCR), tanto cualitativa como cuantitativa, aumentan la sensibilidad respecto a la IFD, aunque no permiten descartar colonización9.

La precocidad en el inicio del tratamiento antimicrobiano y el empleo de corticoterapia sistémica en casos seleccionados han demostrado mejorar el pronóstico de la NPJ10, 11.

La profilaxis con TMP-SMX en pacientes de riesgo parece la medida más efectiva para su prevención, aunque no elimina totalmente la probabilidad de desarrollar la enfermedad12.

Diseñamos nuestro estudio con el objetivo de describir las características clínicas, epidemiológicas y pronósticas de la NJP en niños atendidos en un hospital de tercer nivel en nuestro país.

**MATERIAL Y MÉTODOS**

Se realizó un estudio observacional descriptivo retrospectivo de pacientes menores de 18 años diagnosticados de NPJ entre enero de 2000 y marzo de 2017 en un hospital pediátrico de tercer nivel en Málaga (España), mediante la recogida de datos a través de las historias clínicas.

Definimos NPJ como todo aquel cuadro clínicamente compatible, con prueba de imagen sugerente de la enfermedad y confirmación microbiológica con aislamiento de *P. jirovecii* en LBA y/o broncoaspirado (mediante PCR o IFD positivas).

Se realizó un análisis descriptivo de las principales variables. Se establecieron dos grupos de comparación, pacientes con infección por VIH y pacientes no VIH. Para el contraste de hipótesis se utilizaron la prueba “Chi cuadrado” para variables cualitativas dicotómicas y la prueba “t” de Student para variables cuantitativas, previa comprobación de normalidad mediante la prueba de Kolmogorov-Smirnov*.*

El estudio fue aprobado por el comité ético de investigación clínica de nuestro centro, no se empleó consentimiento informado por tratarse de un estudio retrospectivo en el que no se exponen explícitamente datos de cada paciente individual.

**RESULTADOS**

Se recogieron un total de 23 episodios, en 23 pacientes. De ellos 15/23 (65%) eran varones con una mediana de edad de 3,10 años (RIC 0,51-7,20 años) durante el episodio. Presentaban alguna enfermedad hematológica 11/23 (47,8%) pacientes, de las que 9/11 (82%) eran leucemias linfoblásticas agudas (LLA). Padecían inmunodeficiencia primaria (IDP) 5/23 (21,7%), de las que 4/5 (80%) eran inmunodeficiencias combinadas graves y 1/5 (20%) era una agammaglobulinemia ligada al X (ALX). Únicamente 4/23 (17,4%) pacientes presentaban infección por VIH. El resto de los casos, 3/23 (13,1%), habían recibido glucocorticoides sistémicos (GCs) a dosis altas (2mg/kg/día) por su patología de base, incluyendo un paciente con síndrome de Guillain-Barré, una enfermedad mixta del tejido conectivo (EMTC) y un síndrome hemofagocítico; los dos últimos, además, recibían otros tratamientos inmunosupresores (tabla 1).

No se detectó ningún caso de NPJ en el subgrupo de pacientes VIH en los últimos 6 años de estudio (gráfico 1).

Ambos subgrupos (pacientes VIH y no VIH) eran comparables respecto a sus características epidemiológicas (tabla 2).

Recibían profilaxis con TMP-SMX antes de desarrollar la NPJ 11/23 (47,8%) pacientes. En el subgrupo de pacientes no VIH 10/19 (52,6%) recibían TMP-SMX profiláctico, de los que 9/10 (90,0%) padecían LLA y 1/10 (10%) presentaba una IDP, mientras que 9/19 (47,4%) no recibían profilaxis previamente, en la mayoría de los casos (6/9; 66,7%) por ser la NPJ la forma de debut de su enfermedad de base (4/9 IDP, 1/9 neoplasia hematológica y 1/9 síndrome hemofagocítico). Los otros tres pacientes restantes del subgrupo no VIH sin profilaxis con TMP-SMX recibían GCs a dosis altas. De los pacientes con infección por VIH sólo uno de los cuatro recibía profilaxis previamente; en los otros 3 pacientes la NPJ fue la forma de debut de la infección por VIH.

Los signos clínicos más frecuentes al debut fueron la dificultad respiratoria y la hipoxemia, presente en todos los pacientes. El hallazgo radiológico más frecuente fue el infiltrado intersticial bilateral (21/23; 91,3%). Los hallazgos analíticos y de las pruebas de imagen se resumen en la tabla 2.

Respecto al diagnóstico, en 22/23 (95,6%) pacientes se realizó LBA, con aislamiento positivo en 22/22 (100%). De ellas 15/22 (68,2%) muestras fueron positivas por IFD, 11/22 (50%) por PCR y 4/22 (18,2%) obtuvieron positividad en ambas técnicas. En el paciente con EMTC el diagnóstico se estableció por positividad de PCR en BAS.

Todos los pacientes recibieron tratamiento con TMP-SMX iv a 20mg/kg/día, con una media de 1 día de retraso en el inicio del tratamiento desde el comienzo de la clínica. Recibieron tratamiento con corticoides por la gravedad del cuadro 15/23 (78,3%) pacientes, con una dosis media de 2mg/kg/día y una media de 2,65 días de retraso desde el inicio de los síntomas.

Precisaron ingreso en UCI 19/23 (82,6%) pacientes, con necesidad de ventilación mecánica en 15/19 (78,9%). Se empleó ventilación mecánica no invasiva en 4/15 (26,6%) pacientes, con una duración media de 4,5 días, dos de los cuales precisaron posteriormente intubación y soporte respiratorio con ventilación mecánica convencional. Se utilizó ventilación mecánica convencional en 13/15 (86,7%), con una duración media de 7 días, siendo preciso el inicio de ventilación oscilatoria de alta frecuencia (VAFO) en 8/13 (53,3%) pacientes por problemas de oxigenación, con una duración media de 3 días.

Fallecieron 6/23 pacientes (26,1%), de los que 5/6 (83,3%) eran pacientes no VIH, no siendo significativa la mayor mortalidad evidenciada en los pacientes no VIH respecto a los VIH. Los pacientes no VIH que fallecieron presentaron mayor leucocitosis, mayor retención de CO2 y mayor frecuencia cardíaca al debut respecto a los pacientes no VIH que sobrevivieron (p<0,05). La mortalidad en el subgrupo de pacientes no VIH fue menor en aquellos recibían profilaxis, con diferencias cercanas a la significación estadística (p 0,08). No se encontraron diferencias en mortalidad respecto al uso o no de corticoides ni en aquellos con mayor retraso en el inicio del tratamiento. No se encontraron diferencias en la mortalidad en pacientes VIH en relación con parámetros analíticos, tratamiento con corticoides ni empleo previo de profilaxis con TMP-SMX (tabla 3).

**DISCUSIÓN**

De forma similar a lo reportado en la literatura, nuestro estudio demuestra que, en la actualidad, los pacientes con neoplasias hematológicas constituyen el subgrupo de pacientes de mayor riesgo para desarrollar NPJ13. A bastante distancia, los pacientes con IDP constituyen el segundo grupo de riesgo, especialmente aquellos afectos de inmunodeficiencias combinadas graves, por afectación de la serie linfoide. En las inmunodeficiencias humorales, como es el caso de la AL X, pueden verse casos de NPJ durante el primer año de vida, probablemente en relación a la afectación de la maduración de los linfocitos T mediada por Anticuerpos14. El descenso en la tasa de transmisión vertical del VIH y el mejor control de la infección en el recién nacido de madre VIH han conseguido que, actualmente en los países desarrollados, dicha infección haya dejado de ser el principal factor de riesgo para padecer NPJ. En nuestra serie no se han descrito casos de NPJ en pacientes VIH en los últimos 7 años.

A pesar de que las indicaciones de profilaxis frente a *P. jirovecii* están bien establecidas en pacientes VIH y en pacientes oncológicos, no existen guías ni recomendaciones en este sentido en el resto de grupos de riesgo 4, 8, 10, 11, 12, 15, 16. Este hecho, unido a que en muchos casos la NPJ constituye la forma de debut de la patología de base, explica que algo más de la mitad de nuestra serie no recibiese profilaxis con TMP-SMX previamente. De los 12 pacientes que no recibían profilaxis, el 75% no tenían diagnóstico previo de enfermedad predisponente, siendo la NPJ el debut de su enfermedad de base. Los otros 3 pacientes sin profilaxis recibían glucocorticoides sistémicos a dosis altas (síndrome de Guillain-Barré, enfermedad mixta del tejido conectivo y síndrome de Evans), no habiendo iniciado profilaxis por ausencia de recomendaciones específicas al respecto en el momento de desarrollar la enfermedad. Tal y como demuestra nuestra serie el empleo de profilaxis antimicrobiana no elimina totalmente el riesgo de NPJ, aunque las causas son aún desconocidas.

Clásicamente se ha descrito una evolución más rápida, con mayor distrés respiratorio y mayor hipoxemia de la NPJ en pacientes no VIH respecto a los pacientes VIH4, 8, 17, aunque en nuestra serie no hemos podido encontrar dichas diferencias, probablemente por el escaso tamaño muestral en el subgrupo VIH, que hace poco valorable la comparación entre ambos grupos.

Respecto al diagnóstico, todos los pacientes de nuestra serie se diagnosticaron mediante LBA a excepción de un paciente con enfermedad mixta del tejido conectivo en el que no pudo realizarse dicha técnica por inestabilidad respiratoria, estableciéndose el diagnóstico en este caso por positividad de PCR a *P. jirovecii* en BAS. La mayoría de pacientes de nuestra serie se diagnosticaron por IFD positiva, que constituye el gold estándar para el diagnóstico, con una sensibilidad del 62,5%, similar a lo reportado en pacientes VIH11. En 7/23 (30,4%) el diagnóstico se estableció por PCR cualitativa, de los que 6/7 (85,6%) eran pacientes no VIH, subgrupo de pacientes en los que se ha descrito una menor sensibilidad de la IFD por tener menor carga microbiana en las diferentes muestras respiratorias18. Además, 4/7 (57%) pacientes diagnosticados por PCR recibían profilaxis con TMP-SMX, situación que también reduce la carga microbiana y con ello la sensibilidad de la IFD.

Todos los pacientes de nuestra serie recibieron tratamiento intravenoso con TMP-SMX a 20mg/kg/día, tratamiento de primera elección en NPJ recomendado en las guías8, 10, 11, iniciado de forma precoz. Las recomendaciones actuales incluyen el tratamiento con prednisona oral o metilprednisolona intravenosa en pacientes VIH afectos de NPJ moderada-grave, pacientes que asocien hipoxemia o aquellos que recibiesen previamente corticoides sistémicos por otro motivo, recomendándose su inicio preferiblemente en las primeras 72 horas desde la instauración del tratamiento antimicrobiano 8, 11. A pesar de que algunos estudios han demostrado un descenso en la mortalidad con el uso de corticoides en estas indicaciones (motivo por el que se ha extrapolado la recomendación a pacientes no VIH con estos mismos criterios), en nuestra serie no hemos podido demostrar que el uso de corticoides sistémicos se asocie a un descenso en la mortalidad, probablemente por el escaso tamaño muestral global y del subgrupo de pacientes VIH, que impide realizar una comparación valorable con el subgrupo no VIH. Aunque todos los pacientes de nuestro estudio presentaban hipoxemia, y según la recomendación actual deberían haber recibido corticoides, estamos ante un estudio retrospectivo, en el que la indicación de dicho tratamiento se realizó según las recomendaciones del momento histórico en el que se produjeron. En estos pacientes, la gravedad del cuadro pudo haber determinado la indicación de iniciar el tratamiento adyuvante con GCs, pudiendo estar nuestros resultados sesgados por este motivo.

La mortalidad en nuestra muestra fue globalmente inferior a lo reportado en otros estudios a expensas de una mortalidad inferior al 40-50% esperable en el subgrupo de pacientes no VIH19. La mortalidad en pacientes VIH fue similar a lo reportado en la literatura8, 11. El porcentaje de fallecimientos en nuestra muestra fue similar en ambos grupos, contrariamente al peor pronóstico de los pacientes no VIH previamente reportado en la literatura4,15,17. El escaso tamaño muestral y las diferencias existentes entre ambos subgrupos pueden ser las responsables de estos hallazgos. Probablemente por el mismo motivo no hemos podido encontrar diferencias en mortalidad respecto al empleo previo de profilaxis con TMP-SMX de forma global, aunque al realizar el análisis por subgrupos, los pacientes no VIH que la recibían presentaron menor mortalidad respecto a aquellos que no recibían dicha profilaxis. Estas diferencias no se encontraron en pacientes VIH, pues únicamente un paciente de este grupo recibía profilaxis, presentando este paciente un desenlace favorable. En contraposición con lo publicado en la literatura4, 7, 16, no encontramos en nuestra muestra diferencias en mortalidad en relación con otros parámetros analíticos ni con el empleo de corticoides, ni en el análisis global de la muestra ni el análisis por subgrupos.

Los resultados de este estudio deben tomarse con cautela, dado que se trata de un estudio transversal que no permite establecer relaciones de causalidad. Otras limitaciones de nuestro estudio son su diseño retrospectivo, el pequeño tamaño muestral y las diferencias de tamaño de ambos subgrupos, situaciones que dificultan la capacidad para encontrar significación estadística y para realizar comparaciones valorables entre subgrupos, respectivamente.

En conclusión, nuestro estudio revela que la NPJ en pediatría se presenta, en el momento actual, principalmente a pacientes inmunosuprimidos no afectos de infección por VIH, a pesar incluso del empleo de profilaxis antimicrobiana. La mortalidad continúa siendo elevada, aunque inferior a lo previamente reportado, por lo que es fundamental mantener un elevado nivel de sospecha, pues el inicio precoz del tratamiento es un importante factor pronóstico.

**BIBLIOGRAFÍA**

1. Edman JC, Kovacs JA, Masur H, Santi D V., Elwood HJ, Sogin ML. Ribosomal RNA sequence shows Pneumocystis carinii to be a member of the Fungi. Nature. 1988;334(6182):519–22.

2. Pneumocystis carinii Infection : Evidence for High Prevalence in Normal and Immunosuppressed. 1978;61(1).

3. Vargas SL, Hughes WT, Santolaya ME, Ulloa A V., Ponce CA, Cabrera CE, et al. Search for Primary Infection by Pneumocystis carinii in a Cohort of Normal, Healthy Infants. Clin Infect Dis [Internet]. 2001;32(6):855–61. Available from: https://academic.oup.com/cid/article-lookup/doi/10.1086/319340

4. Pyrgos V, Shoham S, Roilides E, Walsh TJ. Pneumocystis pneumonia in children. Paediatr Respir Rev. 2009;10(4):192–8.

5. Castro JG, Morrison-Bryant M. Management of Pneumocystis Jirovecii pneumonia in HIV infected patients: current options, challenges and future directions [Internet]. Vol. 2010, HIV/AIDS : Research and Palliative Care, Vol 2010, Iss default, Pp 123-134 (2010). 2010. p. 123–34. Available from: https://doaj.org/article/970b179b600945fbb3e7f8c3d4bb5ee9.

6. Koziel H, Eichbaum Q, Kruskal BA, Pinkston P, Rogers RA, Armstrong MYK, et al. Reduced binding and phagocytosis of Pneumocystis carinii by alveolar macrophages from persons infected with HIV-1 correlates with mannose receptor downregulation. J Clin Invest. 1998;102(7):1332–44.

7. Catherinot E, Lanternier F, Bougnoux ME, Lecuit M, Couderc LJ, Lortholary O. Pneumocystis jirovecii Pneumonia. Infect Dis Clin North Am. 2010;24(1):107–38.

8. Panel on Antiretroviral Guidelines for Adults and Adolescents. Guidelines for the Prevention and Treatment of Opportunistic Infections in HIV-Infected Adults. Dep Heal Hum Serv. 2018;408.

9. Guigue N, Alanio A, Menotti J, De Castro N, Hamane S, Peyrony O, et al. Utility of adding Pneumocystis jirovecii DNA detection in nasopharyngeal aspirates in immunocompromised adult patients with febrile pneumonia. Med Mycol. 2014;53(3):241–7.

10. Maschmeyer G, Helweg-Larsen J, Pagano L, Robin C, Cordonnier C, Schellongowski P. ECIL guidelines for treatment of Pneumocystis jirovecii pneumonia in non-HIV-infected haematology patients. J Antimicrob Chemother. 2016;71(9):2405–13.

11. Abzug MJ, Nachman S, Brady MT, Dominguez KL. Guidelines for the Prevention and Treatment of Opportunistic Infections in HIV-Exposed and HIV-Infected Children. 2013;

12. Stern A, Green H, Paul M, Vidal L, Leibovici L, Stern A, et al. Prophylaxis for Pneumocystis pneumonia ( PCP ) in non-HIV immunocompromised patients ( Review ) Prophylaxis for Pneumocystis pneumonia ( PCP ) in non-HIV immunocompromised patients. 2015;(10):2014–6.

13. Fillatre P, Decaux O, Jouneau S, Revest M, Gacouin A, Robert-Gangneux F, et al. AJM online: Incidence of Pneumocystis jiroveci Pneumonia among Groups at Risk in HIV negative Patients. Am J Med [Internet]. 2014;127(12):1242.e11. Available from: <http://search.ebscohost.com/login.aspx?direct=true&db=edselp&AN=S000293431400590>7&site=eds-live

14. BenMustapha-Darghouth I, Trabelsi S, Largueche B, Bejaoui M, Dellagi K, Barbouche MR. Prévalence de la pneumopathie à Pneumocystis Jiroveci au cours des déficits immunitaires héréditaires observés en Tunisie. Arch Pediatr. 2007;14(1):20–3.

15. Avino LJ, Naylor SM, Roecker AM. Pneumocystis jirovecii Pneumonia in the Non–HIV Infected Population. Ann Pharmacother. 2016;50(8):673–9.

16. Committee on Infectious Diseases, American Academy of Pediatrics. Redbook: Report of the Committee on Infectious Diseases. Redbook 2018. p 651-657.

17. Zajac-Spychała O, Gowin E, Fichna P, Wysocki J, Fichna M, Kowala-Piaskowska A, et al. Pneumocystis pneumonia in children - The relevance of chemoprophylaxis in different groups of immunocompromised and immunocompetent paediatric patients. Cent Eur J Immunol. 2015;40(1):91–5.

18. Oren I, Finkelstein R, Hardak E, Sprecher H, Yigla M. Polymerase Chain Reaction-Based Detection of Pneumocystis jirovecii in Bronchoalveolar Lavage Fluid for the Diagnosis of Pneumocystis Pneumonia. Am J Med Sci [Internet]. 2011;342(3):182–5. Available from: http://linkinghub.elsevier.com/retrieve/pii/S0002962915311770

19. Kim K-R, Kim JM, Kang J-M, Kim Y-J. *Pneumocystis jirovecii* pneumonia in pediatric patients: an analysis of 15 confirmed consecutive cases during 14 years. Korean J Pediatr [Internet]. 2016;59(6):252. Available from: https://synapse.koreamed.org/DOIx.php?id=10.3345/kjp.2016.59.6.252
